# Supplementary material for: Inhibition of Chikungunya Virus Infection by 4-Hydroxy-1-Methyl-3-(3-morpholinopropanoyl)quinoline-2(1H)-one (QVIR) Targeting nsP2 and E2 Proteins
Source: PubMed Central journal article supplement — ACS Omega. 2021 Mar 31;6(14):9791–803. doi: 10.1021/acsomega.1c00447 (PMC8047676; doi:10.1021/acsomega.1c00447), 2021-03-31
Supplement: ao1c00447_si_001.pdf [file ao1c00447_si_001.pdf]

## **Supporting Information**

### **Inhibition of Chikungunya Virus Infection by 4-Hydroxy-1-methyl-3-(3-morpholinopropanoyl) quinoline-2(1*H*)-one (QVIR) Targeting nsP2 and E2 Proteins**

Mohammad Islamuddin\*<sup>ϕ1,5</sup>, Obaid Afzal<sup>ϕ2</sup>, Wajihul Hasan Khan<sup>3</sup>, Malik Hisamuddin<sup>1</sup>, Abdulmalik Saleh Alfawaz Altamimi\*<sup>2</sup>, Ibraheem Husain<sup>4</sup>, Kentaro Kato<sup>5</sup>, Mubarak A. Alamri<sup>2</sup>, Shama Parveen\*<sup>1</sup>

<sup>1</sup>Molecular Virology Laboratory, Centre for Interdisciplinary Research in Basic Sciences, Jamia Millia Islamia, New Delhi, India.

<sup>2</sup>Department of Pharmaceutical Chemistry, College of Pharmacy, Prince Sattam Bin Abdulaziz University, Al Kharj 11942, Saudi Arabia.

<sup>3</sup>Kusuma School of Biological Sciences, Indian Institute of Technology (IIT), New Delhi, India.

<sup>4</sup>Department of Pharmacology, School of Pharmaceutical and Research, Hamdard University, New Delhi, India.

<sup>5</sup>Laboratory of Sustainable Animal Environment, Graduate School of Agricultural Science, Tohoku University, Miyagi, Japan.

#### **\*Corresponding authors**

Dr. Mohammad Islamuddin (Ph.D) E-mail: [pdf.mislamuddin@jmi.ac.in](mailto:pdf.mislamuddin@jmi.ac.in)

Dr. Abdulmalik Saleh Alfawaz Altamimi (Ph.D) E-mail: [as.altamimi@psau.edu.sa](mailto:as.altamimi@psau.edu.sa)

Dr. Shama Parveen (Ph.D) E-mail: [sparveen2@jmi.ac.in](mailto:sparveen2@jmi.ac.in)

ϕ These authors contributed equally to this work

#### **Author's Email address**

Mohammad Islamuddin [pdf.mislamuddin@jmi.ac.in](mailto:pdf.mislamuddin@jmi.ac.in)

Obaid Afzal [o.akram@psau.edu.sa](mailto:o.akram@psau.edu.sa)

Wajihul Hasan Khan [wajihulbiotech@gmail.com](mailto:wajihulbiotech@gmail.com)

Malik Hisamuddin [hmalik1984@gmail.com](mailto:hmalik1984@gmail.com)

Abdulmalik SA Altamimi [as.altamimi@psau.edu.sa](mailto:as.altamimi@psau.edu.sa)

Ibraheem Husain [ibraheemhusain786@gmail.com](mailto:ibraheemhusain786@gmail.com)

Kentaro Kato [kentaro.kato.c7@tohoku.ac.jp](mailto:kentaro.kato.c7@tohoku.ac.jp)

Mubarak A Alamri [m.alamri@psau.edu.sa](mailto:m.alamri@psau.edu.sa)

Shama Parveen [sparveen2@jmi.ac.in](mailto:sparveen2@jmi.ac.in)

**Table of contents**

| <b>S. No.</b> | <b>Content</b>                                                                                                                          | <b>Page number</b> |
|---------------|-----------------------------------------------------------------------------------------------------------------------------------------|--------------------|
| 1.            | <sup>1</sup> H NMR spectrum of compound QVIR (4-hydroxy-1-methyl-3-(3-morpholinopropanoyl)quinoline-2(1 <i>H</i> )-one hydrochloride).  | S3                 |
| 2.            | <sup>13</sup> C NMR spectrum of compound QVIR (4-hydroxy-1-methyl-3-(3-morpholinopropanoyl)quinoline-2(1 <i>H</i> )-one hydrochloride). | S4                 |

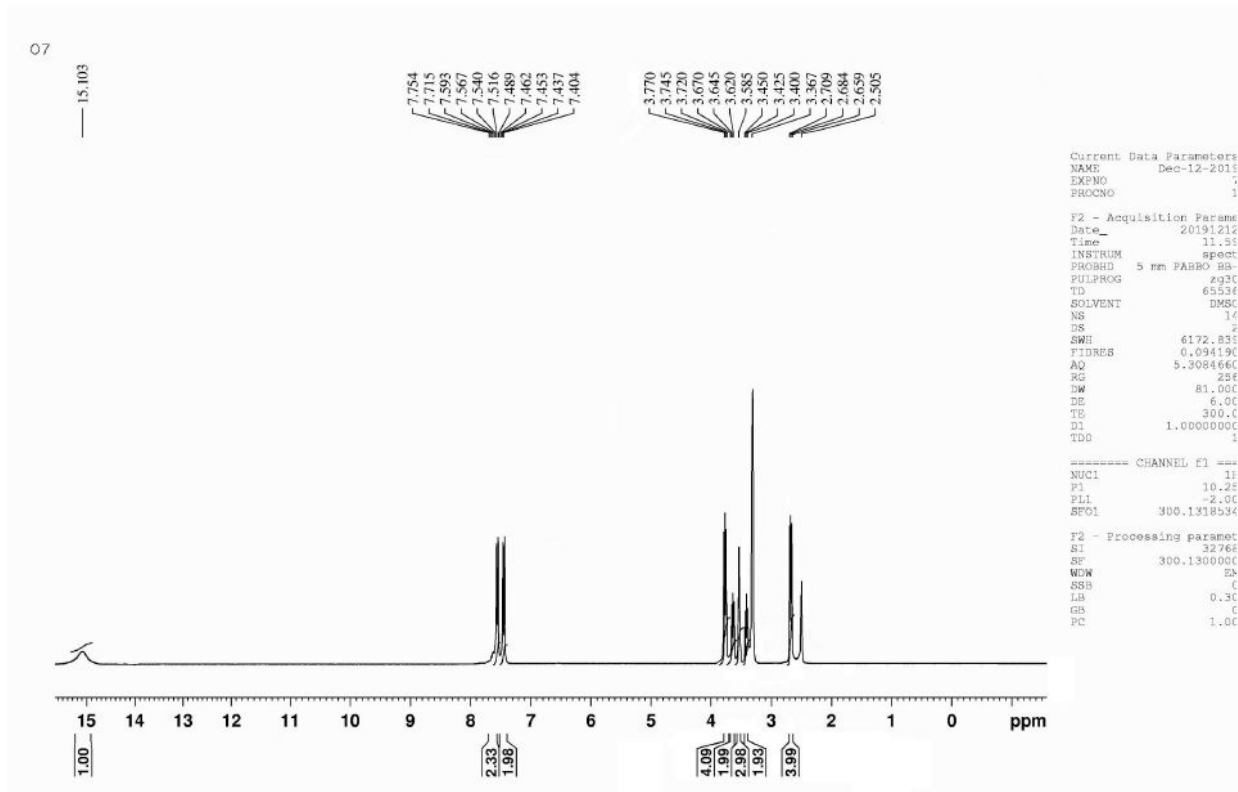

**Figure S1:**  $^1\text{H}$  NMR spectrum of compound QVIR (4-hydroxy-1-methyl-3-(3-morpholinopropanoyl)quinoline-2(1*H*)-one hydrochloride).

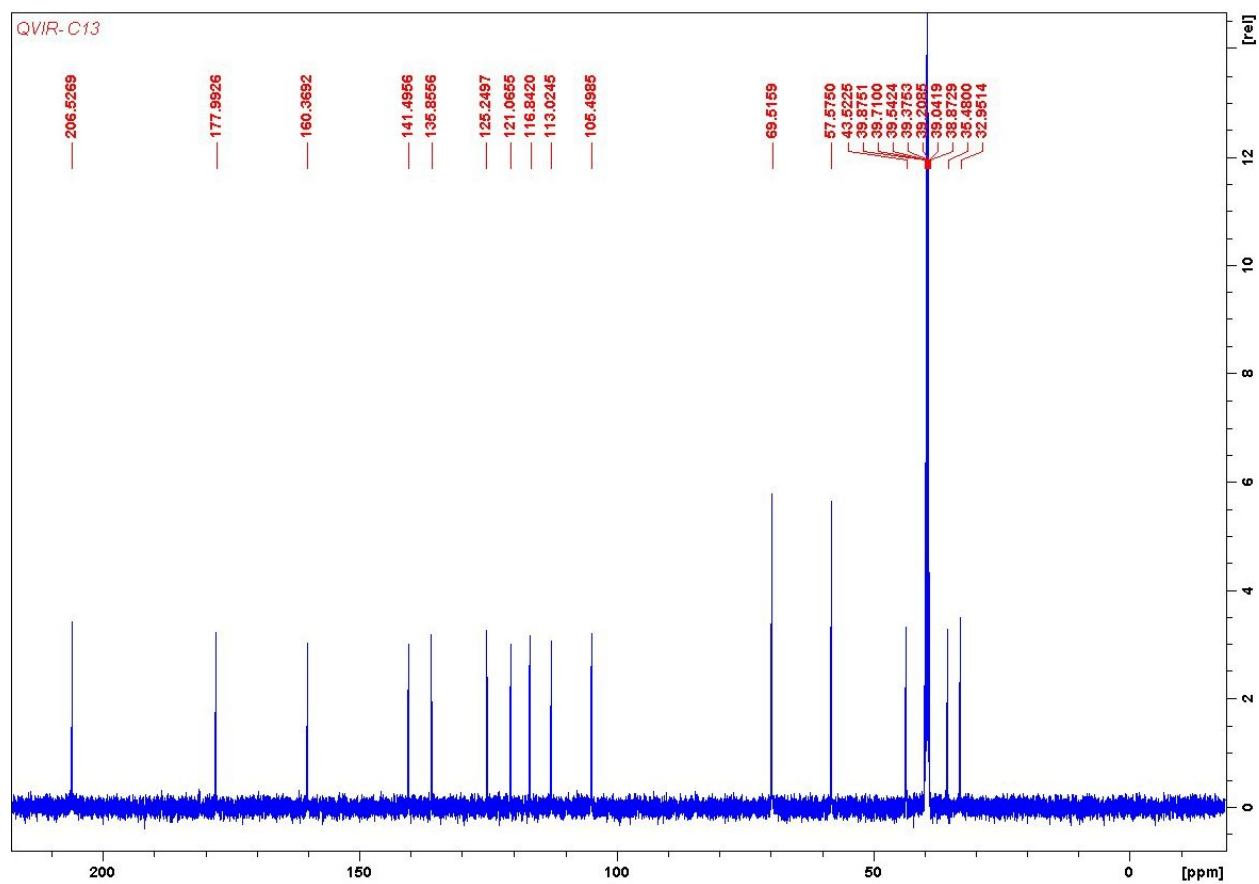

**Figure S2:**  $^{13}\text{C}$  NMR spectrum of compound QVIR (4-hydroxy-1-methyl-3-(3-morpholinopropanoyl)quinoline-2(1*H*)-one hydrochloride).
